# Supplementary material for: Antimicrobial and alpha-glucosidase inhibitory flavonoid glycosides from the plant Mussaenda recurvata : in vitro and in silico approaches
Source: Royal Society of Chemistry journal article supplement (doi:10.1039/d4ra00666f), 2024-01-01
Supplement: d4ra00666f1.pdf [file d4ra00666f1.pdf]

## Supporting information

### Antimicrobial and alpha-glucosidase inhibitory flavonoid glycosides from the Plant

#### *Mussaenda recurvata*: *in vitro* and *in silico* approaches

Tran Thi Ngoc Mai<sup>1</sup>, Phan Nhat Minh<sup>2,3</sup>, Nguyen Tan Phat<sup>2,3</sup>, Thuc Huy Duong<sup>4\*</sup>, Tran Nguyen Minh An<sup>5\*</sup>, Van Son Dang<sup>1,6</sup>, Nguyen Van Hue<sup>7</sup>, Mai Dinh Tri<sup>2,3\*</sup>

**Table S1.** NMR data of **2** and **3**

| Carbon number | 2 (Astragalin)                       |                                                          | 3 (Isoquercitrin)                    |                                                      |
|---------------|--------------------------------------|----------------------------------------------------------|--------------------------------------|------------------------------------------------------|
|               | $\delta_{\text{C}}^{\text{a,b}}$ ppm | $\delta_{\text{H}}^{\text{a,c}}$ ppm<br>(mult., J in Hz) | $\delta_{\text{C}}^{\text{a,b}}$ ppm | $\delta_{\text{C}}^{\text{a,c}}$<br>(mult., J in Hz) |
| 2             | 156.2                                |                                                          | 156.2                                |                                                      |
| 3             | 133.2                                |                                                          | 133.4                                |                                                      |
| 4             | 177.4                                |                                                          | 177.5                                |                                                      |
| 5             | 161.2                                |                                                          | 161.3                                |                                                      |
| 6             | 98.7                                 | 6.20 (1H, d, 1.8)                                        | 98.7                                 | 6.20 (1H, d, 1.8)                                    |
| 7             | 164.2                                |                                                          | 164.2                                |                                                      |
| 8             | 93.6                                 | 6.42 (1H, d, 1.8)                                        | 93.6                                 | 6.41 (1H, d, 1.8)                                    |
| 9             | 156.4                                |                                                          | 156.4                                |                                                      |
| 10            | 104.0                                |                                                          | 104.0                                |                                                      |
| 1'            | 120.9                                |                                                          | 121.6                                |                                                      |
| 2'            | 130.9                                | 8.03 (1H, d, 9.0)                                        | 116.3                                | 7.57 (1H, d, 1.8)                                    |
| 3'            | 115.1                                | 6.88 (1H, d, 9.0)                                        | 144.8                                |                                                      |
| 4'            | 159.9                                |                                                          | 148.5                                |                                                      |
| 5'            | 115.1                                | 6.88 (1H, d, 9.0)                                        | 115.3                                | 6.85 (1H, d, 9.0)                                    |
| 6'            | 130.9                                | 8.03 (1H, d, 9.0)                                        | 121.2                                | 7.58 (1H, dd, 1.8, 7.8)                              |
| 5-OH          |                                      | 12.61 (1H, s)                                            |                                      | 12.63 (1H, s)                                        |
| 1''           | 100.9                                | 5.45 (1H, d, 7.8)                                        | 100.9                                | 5.46 (d, 7.8)                                        |

| Carbon number | 2 (Astragalin)                       |                                                       | 3 (Isoquercitrin)                    |                                                   |
|---------------|--------------------------------------|-------------------------------------------------------|--------------------------------------|---------------------------------------------------|
|               | $\delta_{\text{C}}^{\text{a,b}}$ ppm | $\delta_{\text{H}}^{\text{a,c}}$ ppm (mult., J in Hz) | $\delta_{\text{C}}^{\text{a,b}}$ ppm | $\delta_{\text{C}}^{\text{a,c}}$ (mult., J in Hz) |
| 2"            | 74.2                                 | 3.20 (1H, m)                                          | 74.1                                 | 3.25 (1H, m)                                      |
| 3"            | 76.4                                 | 3.21 (1H, m)                                          | 76.5                                 | 3.21 (1H, m)                                      |
| 4"            | 69.9                                 | 3.09 (1H, m)                                          | 70.0                                 | 3.09 (1H, m)                                      |
| 5"            | 77.5                                 | 3.08 (1H, m)                                          | 77.6                                 | 3.09 (1H, m)                                      |
| 6"            | 60.8                                 | 3.56 (1H, dd, 11.4, 4.2)<br>3.33 (1H, m)              | 61.0                                 | 3.58 (d, 11.4)<br>3.34 (d, 10.8)                  |

<sup>a</sup> Recorded in DMSO-*d*<sub>6</sub>, <sup>b</sup>150 MHz, <sup>c</sup>600 MHz, <sup>d</sup>125 MHz, <sup>e</sup>500 MHz

**Table S2.** NMR data of **5-7**

| Carbon number | 5 (Rutin)                            |                                                       | 6 (Hesperidin)                       |                                                   | 7 (Neohesperidin)                    |                                                   |
|---------------|--------------------------------------|-------------------------------------------------------|--------------------------------------|---------------------------------------------------|--------------------------------------|---------------------------------------------------|
|               | $\delta_{\text{C}}^{\text{a,c}}$ ppm | $\delta_{\text{H}}^{\text{a,d}}$ ppm (mult., J in Hz) | $\delta_{\text{C}}^{\text{b,e}}$ ppm | $\delta_{\text{C}}^{\text{b,f}}$ (mult., J in Hz) | $\delta_{\text{C}}^{\text{b,c}}$ ppm | $\delta_{\text{C}}^{\text{b,d}}$ (mult., J in Hz) |
| 2             | 159.3                                |                                                       | 78.3                                 | 5.50 (1H, dd, 12.0; 3.0)                          | 78.6                                 | 5.51 (1H, dd, 12.0, 3.0)                          |
| 3             | 135.6                                |                                                       | 42.0                                 | 3.25 (1H, m)<br>2.78 (1H, dd, 17.4; 3.0)          | 42.1                                 | 3.24 (1H, m)<br>2.77 (1H, dd, 17.5; 3.5)          |
| 4             | 179.4                                |                                                       | 196.9                                |                                                   | 197.0                                |                                                   |
| 5             | 162.9                                |                                                       | 162.9                                |                                                   | 163.0                                |                                                   |
| 6             | 99.9                                 | 6.23 (1H, d, 2.0)                                     | 96.3                                 | 6.11 (1H, d, 2.4)                                 | 96.4                                 | 6.12 (1H, d, 2.0)                                 |
| 7             | 166.0                                |                                                       | 165.0                                |                                                   | 165.1                                |                                                   |
| 8             | 94.8                                 | 6.42 (1H, d, 2.0)                                     | 95.5                                 | 6.14 (1H, d, 2.4)                                 | 95.5                                 | 6.13 (1H, d, 2.0)                                 |
| 9             | 158.5                                |                                                       | 162.4                                |                                                   | 162.5                                |                                                   |
| 10            | 105.6                                |                                                       | 103.2                                |                                                   | 103.3                                |                                                   |
| 1'            | 123.1                                |                                                       | 130.8                                |                                                   | 130.4                                |                                                   |

| Carbon number | 5 (Rutin)            |                                                      | 6 (Hesperidin)       |                                                | 7 (Neohesperidin)    |                                   |
|---------------|----------------------|------------------------------------------------------|----------------------|------------------------------------------------|----------------------|-----------------------------------|
|               | $\delta_C^{a,c}$ ppm | $\delta_H^{a,d}$ ppm (mult., J in Hz)                | $\delta_C^{b,e}$ ppm | $\delta_C^{b,f}$ (mult., J in Hz)              | $\delta_C^{b,c}$ ppm | $\delta_C^{b,d}$ (mult., J in Hz) |
| 2'            | 117.7                | 7.69 (1H, d, 2.5)                                    | 114.0                | 6.93 (1H, d, 2.4)                              | 114.1                | 6.92 (1H, d, 2.5)                 |
| 3'            | 145.8                |                                                      | 146.4                |                                                | 146.4                |                                   |
| 4'            | 149.8                |                                                      | 147.8                |                                                | 147.9                |                                   |
| 5'            | 116.0                | 6.90 (1H, d, 8.5)                                    | 112.0                | 6.94 (1H, d, 8.4, 2.4)                         | 112.0                | 6.94 (1H, d, 8.0, 2.0)            |
| 6'            | 123.5                | 7.65 (1H, dd, 8.5, 2.0)                              | 117.7                | 6.89 (1H, d, 8.4)                              | 117.6                | 6.90 (1H, d, 8.0)                 |
| 5-OH          |                      |                                                      |                      | 12.63 (1H, s)                                  |                      | 12.00 (1H, s)                     |
| 4'-OMe        |                      |                                                      | 55.6                 | 3.77 (3H, s)                                   | 55.7                 | 3.76 (3H, s)                      |
| 1''           | 104.7                | 5.13 (1H, d, 8.0)                                    | 99.3                 | 4.96 (1H, d, 7.8)                              | 99.4                 | 4.96 (1H, d, 7.5)                 |
| 2''           | 75.7                 | 3.51 (1H, d, 8.0)                                    | 72.9                 | 3.22 (1H, m)                                   | 76.2                 | 3.28 (1H, m)                      |
| 3''           | 77.2                 | 3.34 (1H, m)                                         | 76.2                 | 3.26 (1H, m)                                   | 75.8                 | 3.48* (1H)                        |
| 4''           | 71.4                 | 3.30 (1H, d, 9.5)                                    | 72.0                 | 3.15 (1H, m)                                   | 73.0                 | 3.12 (1H, m)                      |
| 5''           | 78.1                 | 3.43 (1H, d, 9.0)                                    | 75.4                 | 3.53 (1H, m)                                   | 75.5                 | 3.51*(1H)                         |
| 6''           | 68.5                 | 3.42 (1H, dd, 11.0, 5.0)<br>3.83 (1H, dd, 11.0, 1.0) | 66.0                 | 3.42 (1H, dd, 12.0, 6.0)<br>3.79 (1H, d, 10.4) | 62.6                 | 3.78 (1H, m)<br>3.35 (1H, m)      |
| 1'''          | 102.4                | 4.54 (1H, d, 1.5)                                    | 100.5                | 4.52 (1H, s)                                   | 100.6                | 4.52 (1H, brs)                    |
| 2'''          | 72.1                 | 3.66 (1H, dd, 3.5, 1.5)                              | 69.5                 | 3.13 (1H, m)                                   | 70.2                 | 3.62 (1H, brs)                    |
| 3'''          | 72.2                 | 3.56 (1H, dd, 9.5, 3.5)                              | 70.6                 | 3.43 (1H, m)                                   | 70.7                 | 3.42*(1H)                         |
| 4'''          | 73.9                 | 3.31 (1H, d, 8.5)                                    | 70.2                 | 3.30 (1H, m)                                   | 72.0                 | 3.16 (1H, m)                      |
| 5'''          | 69.7                 | 3.47 (1H, m)                                         | 68.2                 | 3.63 (1H, m)                                   | 69.6                 | 3.13 (1H, m)                      |
| 6'''          | 17.8                 | 1.14 (3H, d, 6.0)                                    | 17.7                 | 1.08 (3H, d, 6.6)                              | 17.7                 | 1.00 (3H, d, 6.0)                 |

<sup>a</sup> Recorded in MeOD-*d*<sub>4</sub>, <sup>b</sup> Recorded in DMSO-*d*<sub>6</sub>, <sup>c</sup> 125 MHz, <sup>d</sup> 500 MHz, <sup>e</sup> 150 MHz, <sup>f</sup> 600 MHz,  
<sup>\*</sup> overlap

### Full mass spectrum

Spectrum from TRI\_MR47\_(-)ESI 2021-11-10-10-32-06.wif2 (sample 1) - TRI\_MR47\_(-)ESI, ...om 0.143 min, noise filtered (noise multiplier = 1.5), Gaussian smoothed (0.5 points)

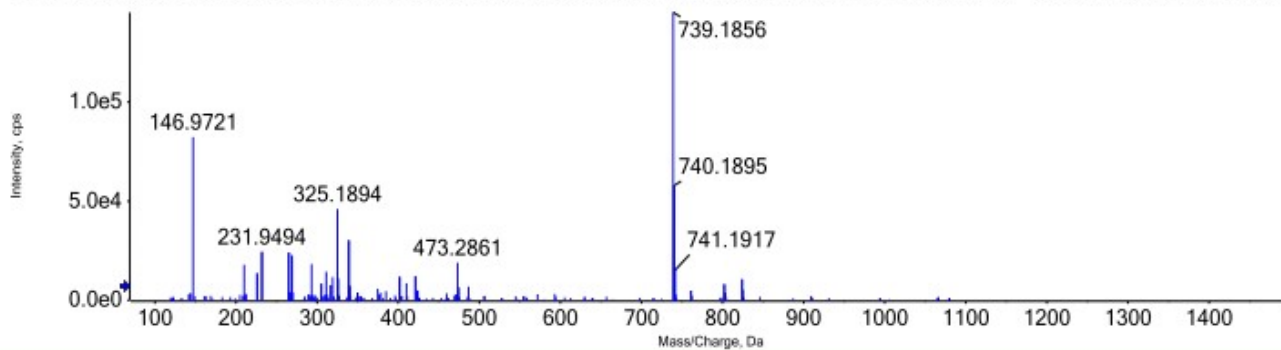

Figure S1. HRESIMS of 1

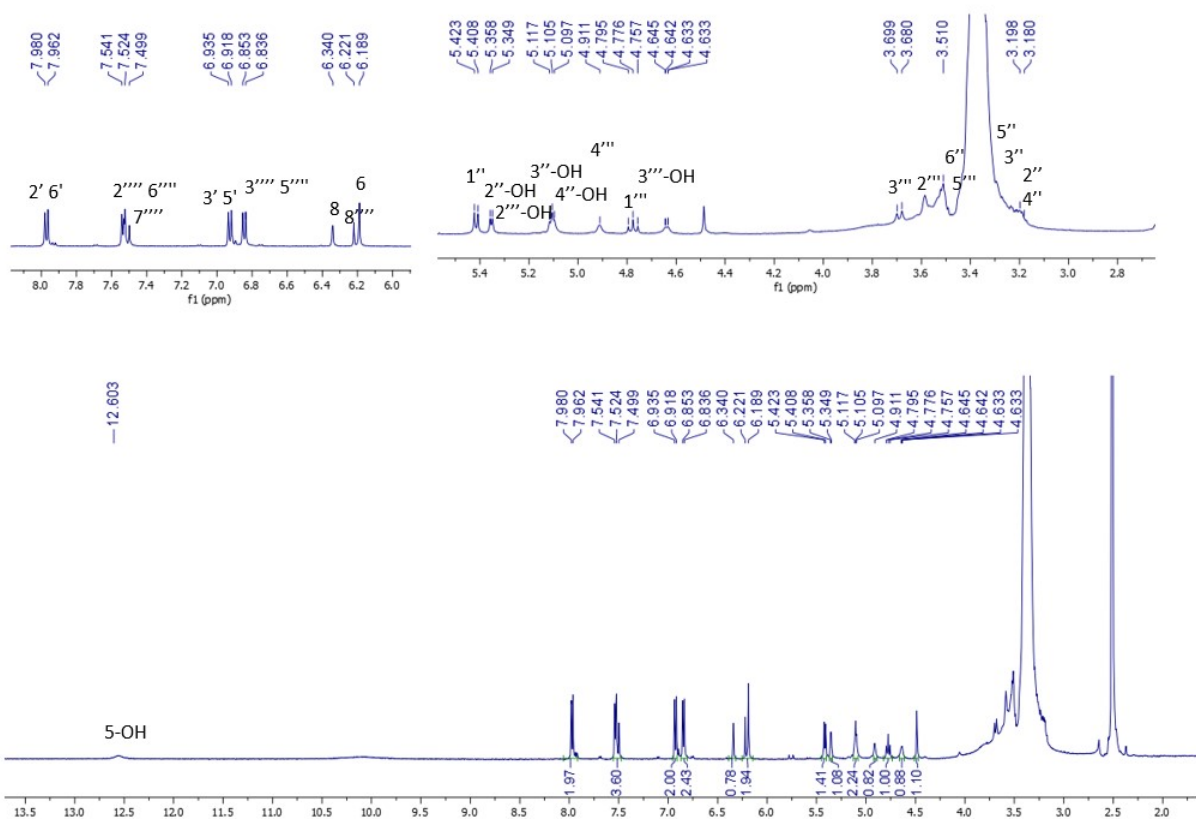

Figure S2. <sup>1</sup>H NMR spectrum of 1

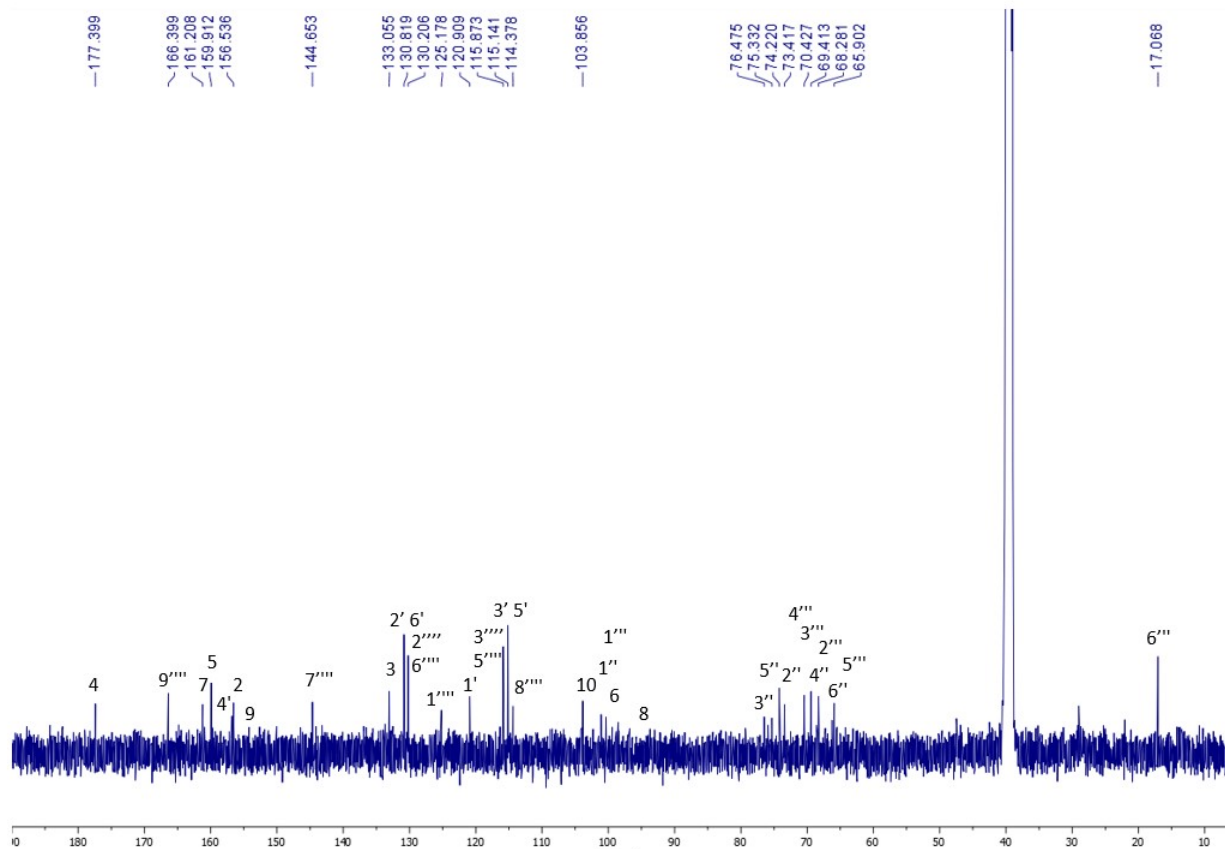

**Figure S3.**  $^{13}\text{C}$  NMR spectrum (JMOL) of **1**

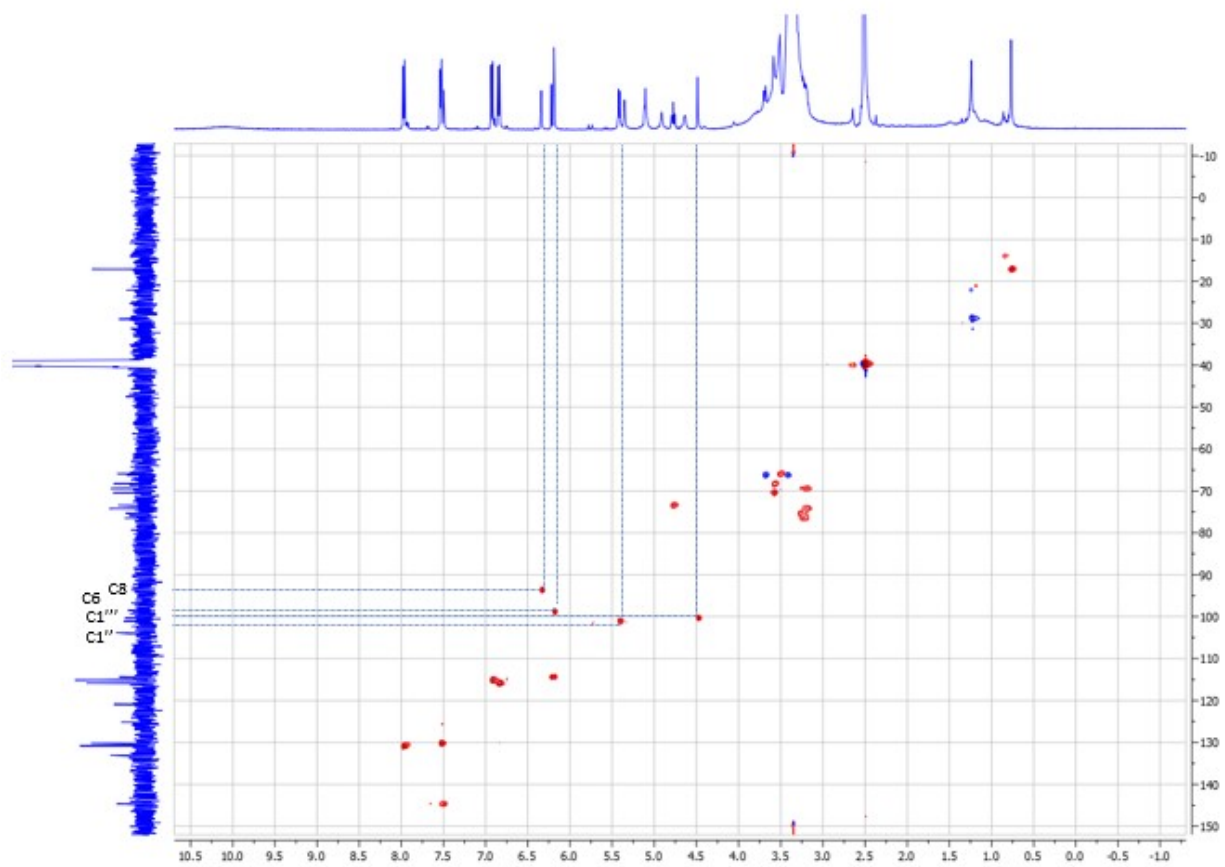

**Figure S4.** HSQC spectrum of **1**

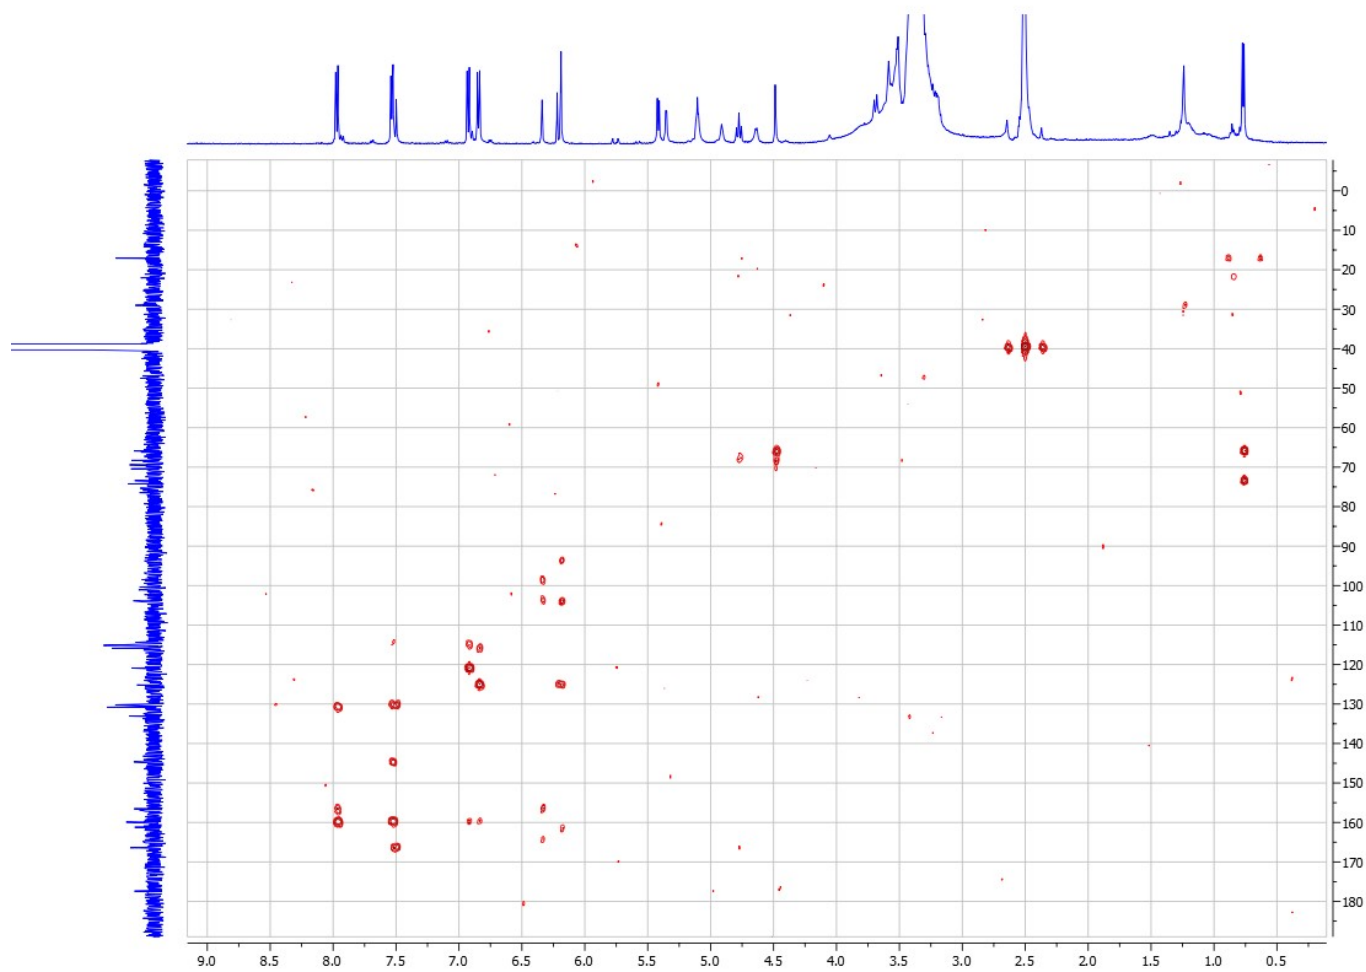

Figure S5. HMBC spectrum of 1

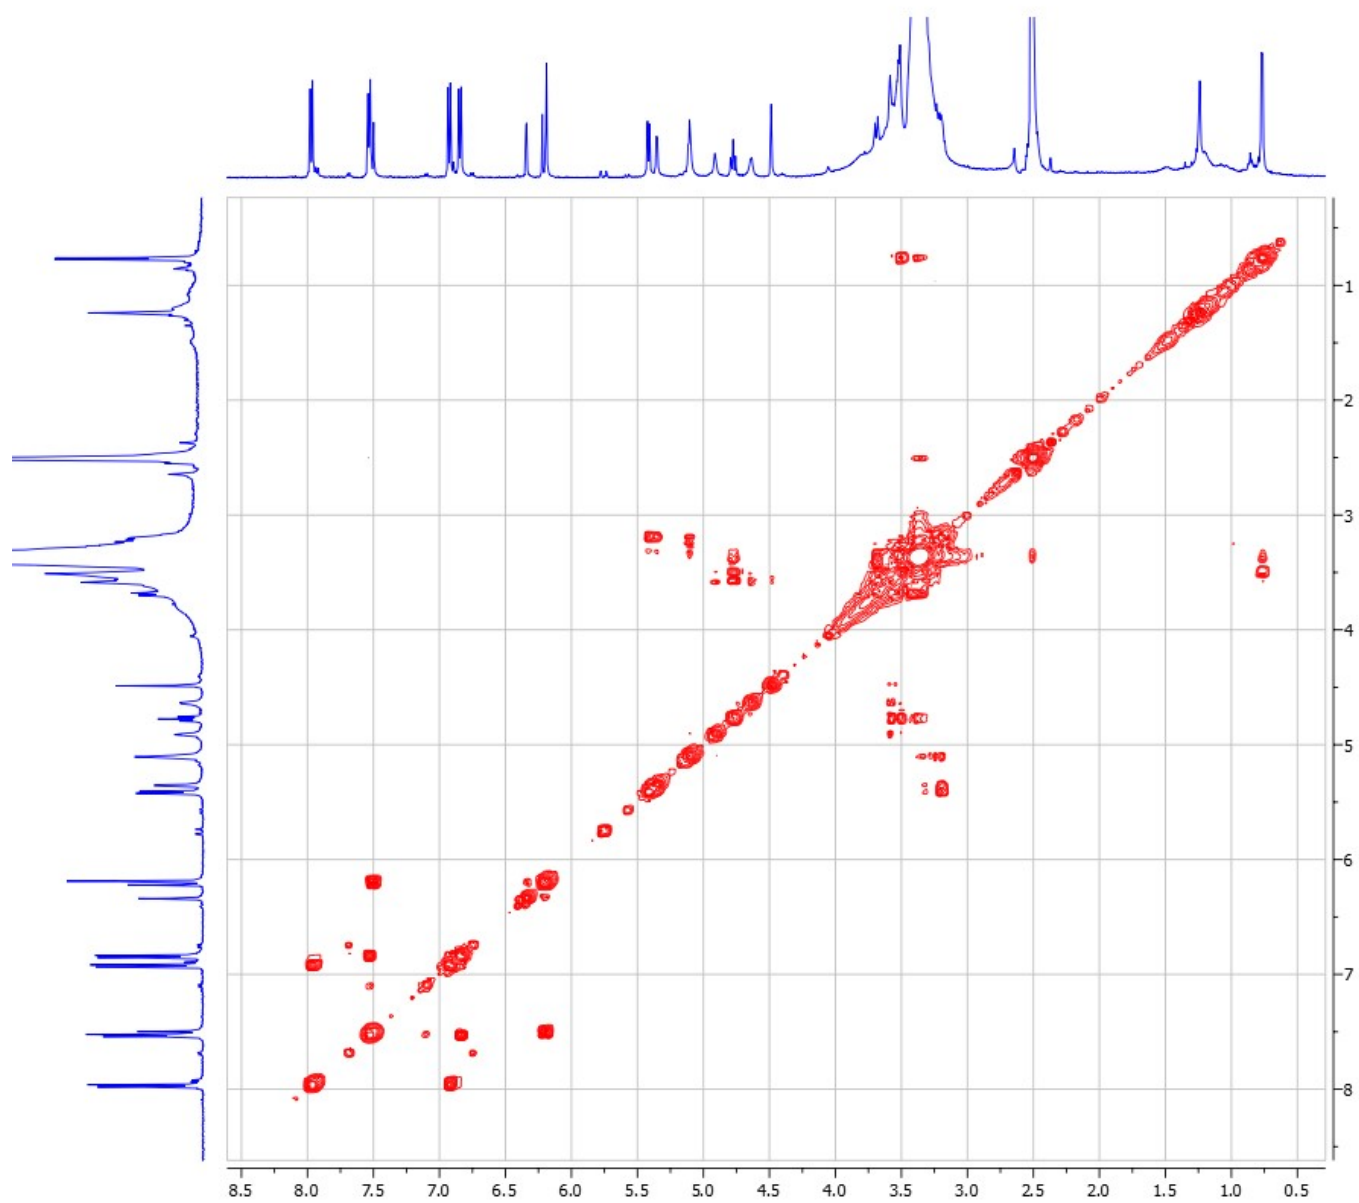

**Figure S6.** COSY spectrum of **1**



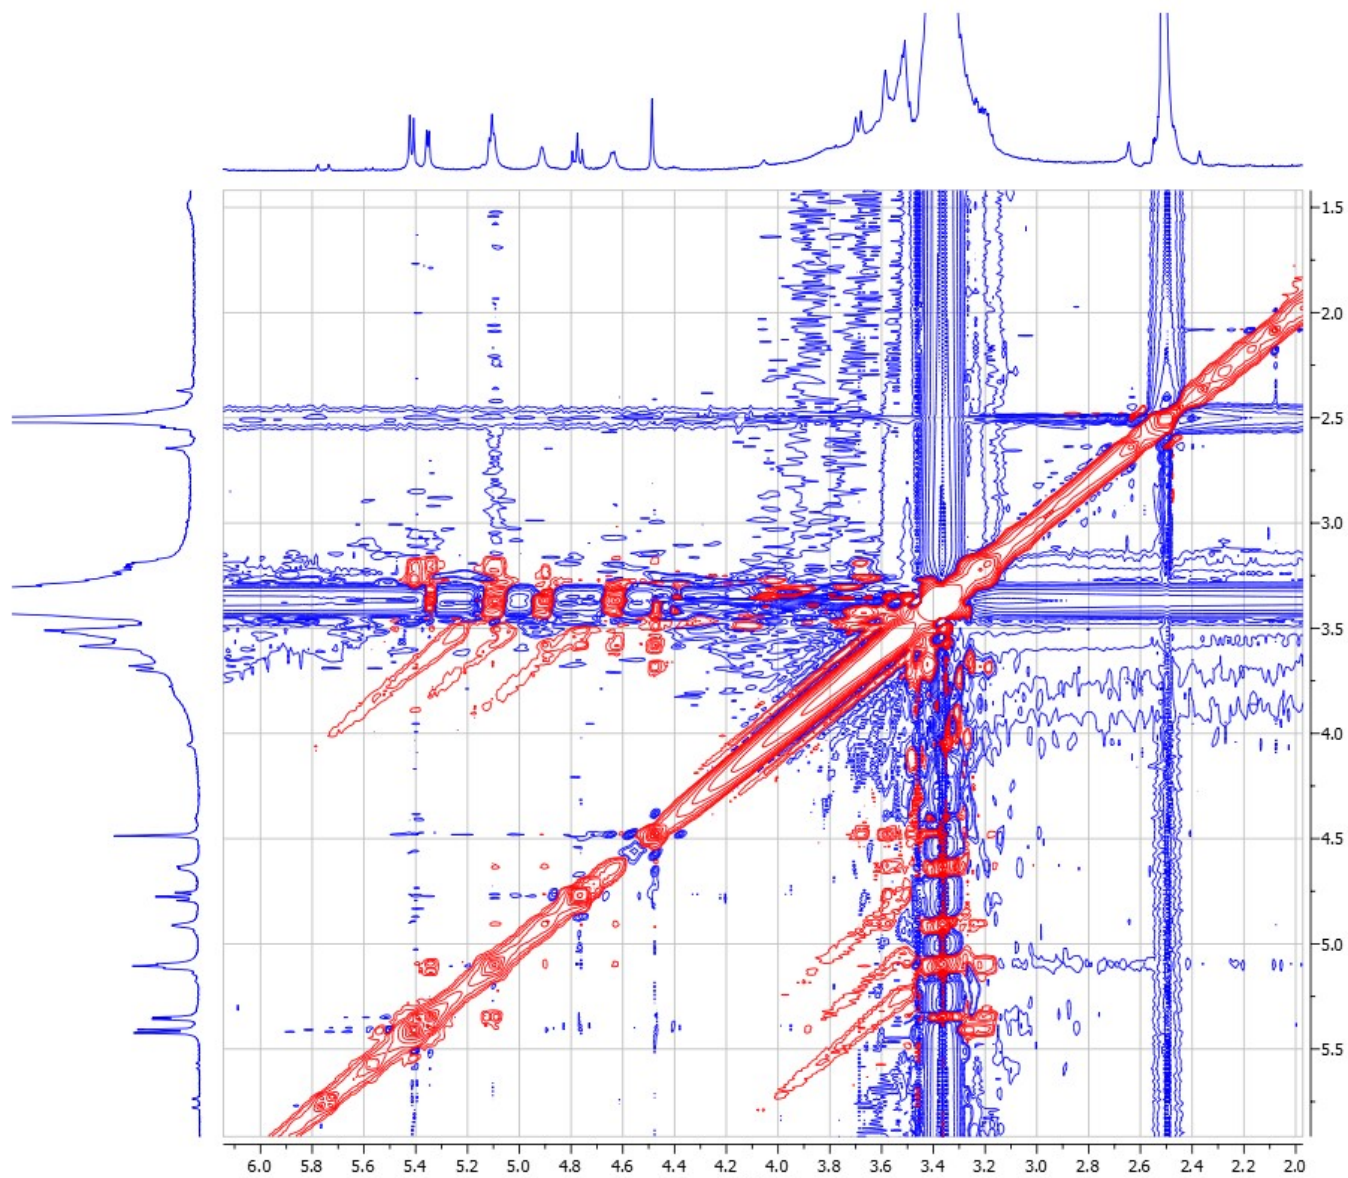

**Figure S7.** NOESY spectrum of **1**

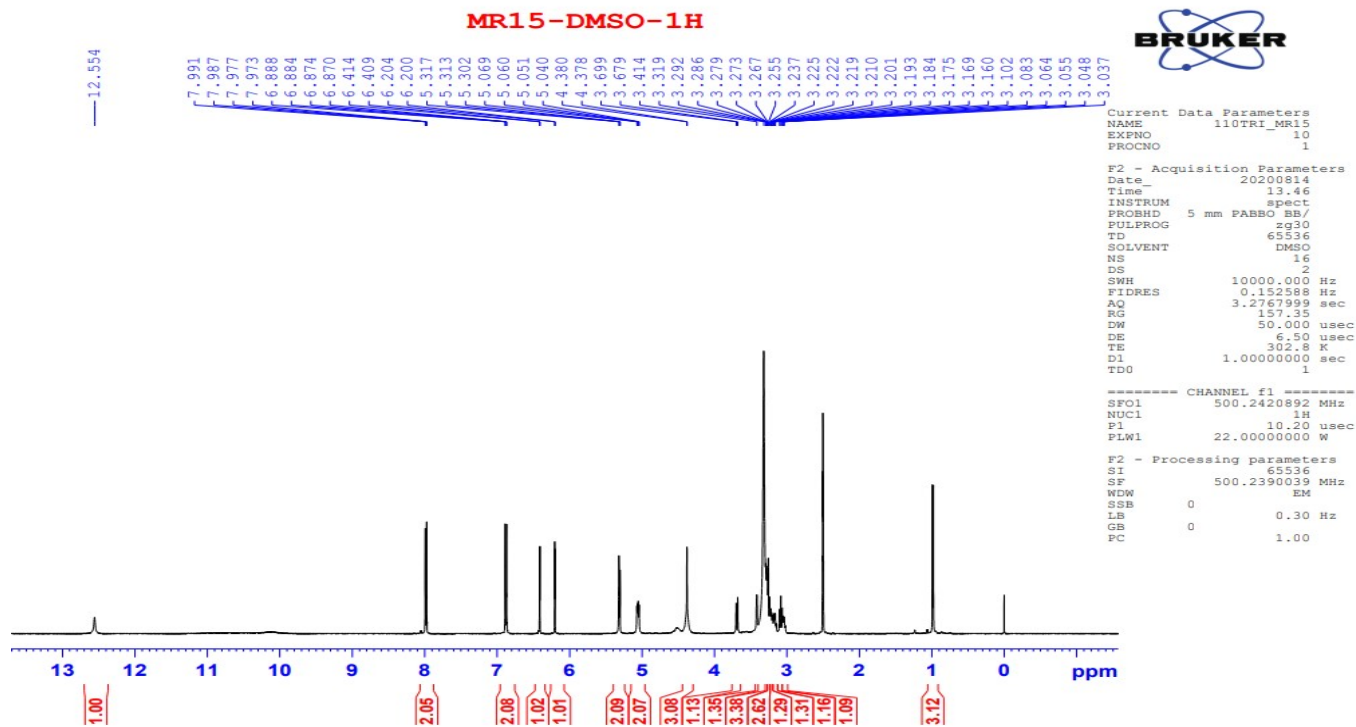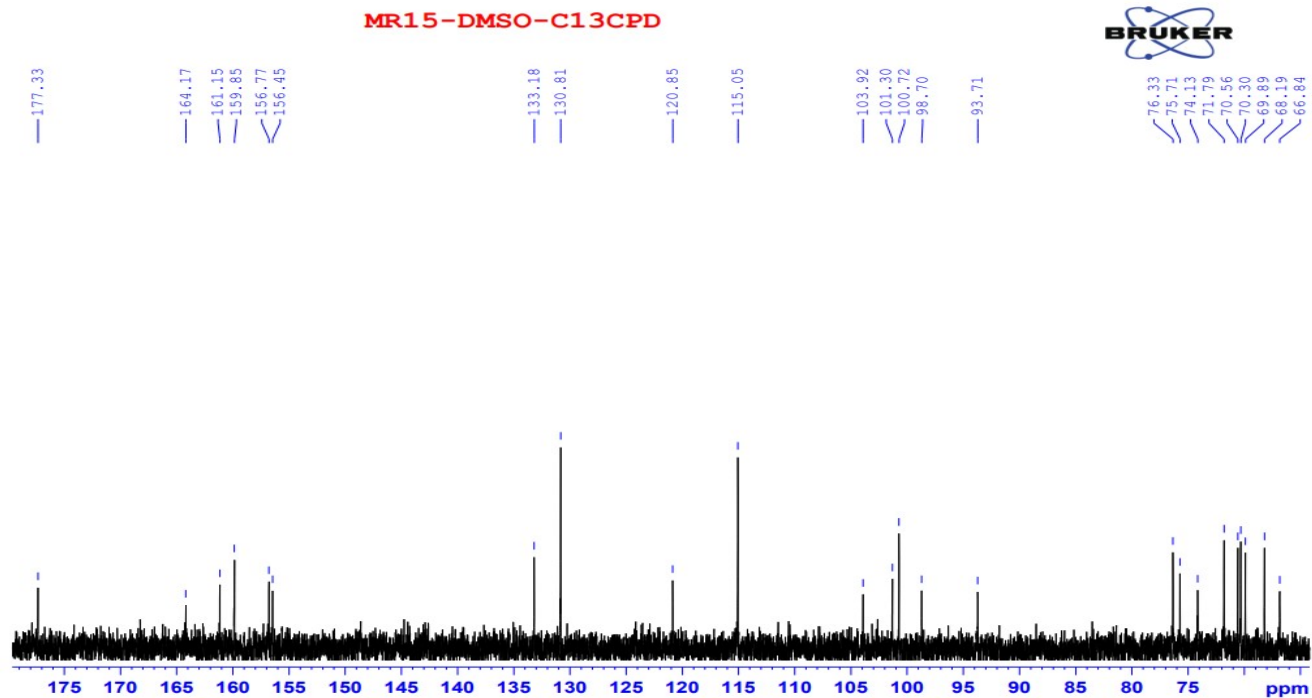

Figure S8.  $^1\text{H}$  and  $^{13}\text{C}$  NMR spectra of **4**

## Simulation Details

Jobname: desmond\_md\_anti-diabetic\_20042023  
Entry title: Full System

| CPU # | Job Type | Ensemble | Temp. [K] | Sim. Time [ns] | # Atoms | # Waters | Charge |
|-------|----------|----------|-----------|----------------|---------|----------|--------|
| 1     | mddsim   | NPT      | 300.0     | 100.102        | 185274  | 52285    | 0      |

## Protein Information

| Tot. Residues | Prot. Chain(s) | Res. in Chain(s)       | # Atoms | # Heavy Atoms | Charge |
|---------------|----------------|------------------------|---------|---------------|--------|
| 1784          | 'A', 'B'       | ict_values([892, 892]) | 27992   | 14324         | -46    |

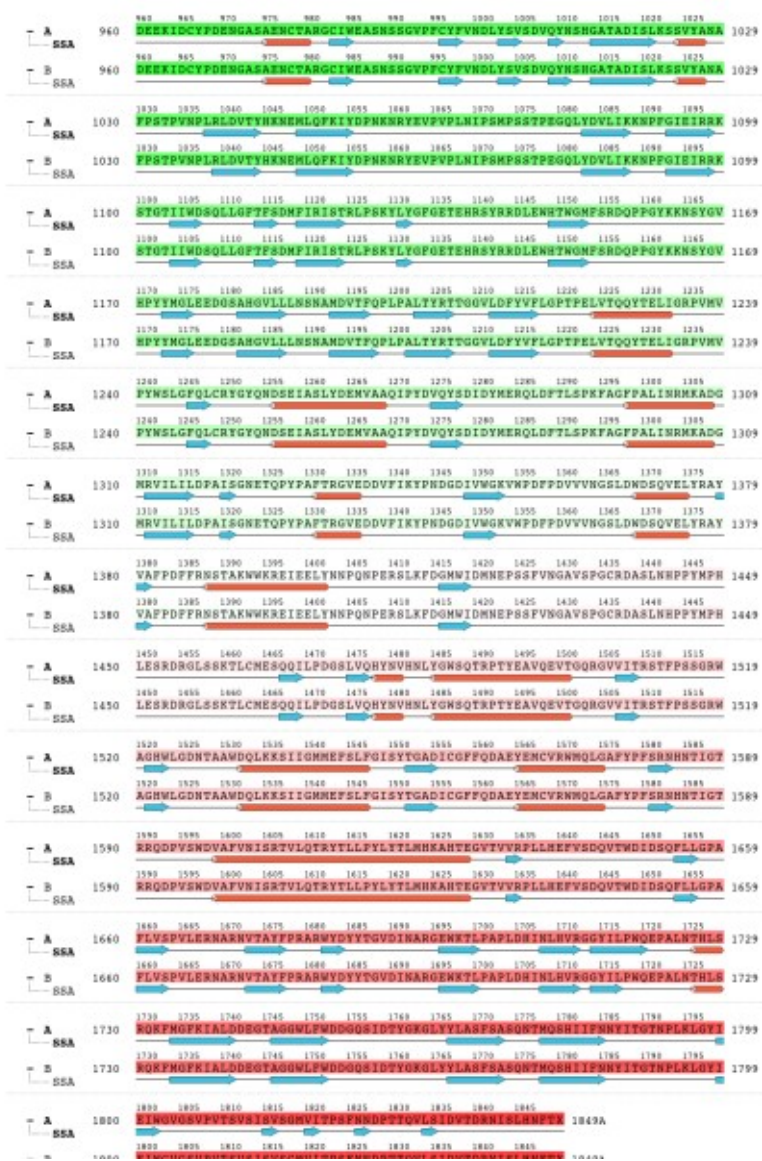

Figure S9. Protein information is indicated Desmond 2018, version 4.

|                    |                                                 |
|--------------------|-------------------------------------------------|
| PDB Name           | 'LIG'                                           |
| Num. of Atoms      | 89 (total) 53 (heavy)                           |
| Atomic Mass        | 740.678 au                                      |
| Charge             | 0                                               |
| Mol. Formula       | C <sub>36</sub> H <sub>36</sub> O <sub>17</sub> |
| Num. of Fragments  | 9                                               |
| Num. of Rot. Bonds | 19                                              |

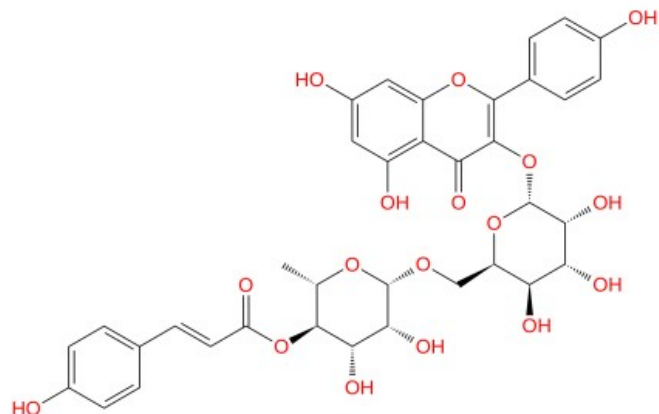

### Counter Ion/Salt Information

**Figure S10.** Ligand information is showed by Desmond 2018 software in Linux or Ubuntu enviroment.

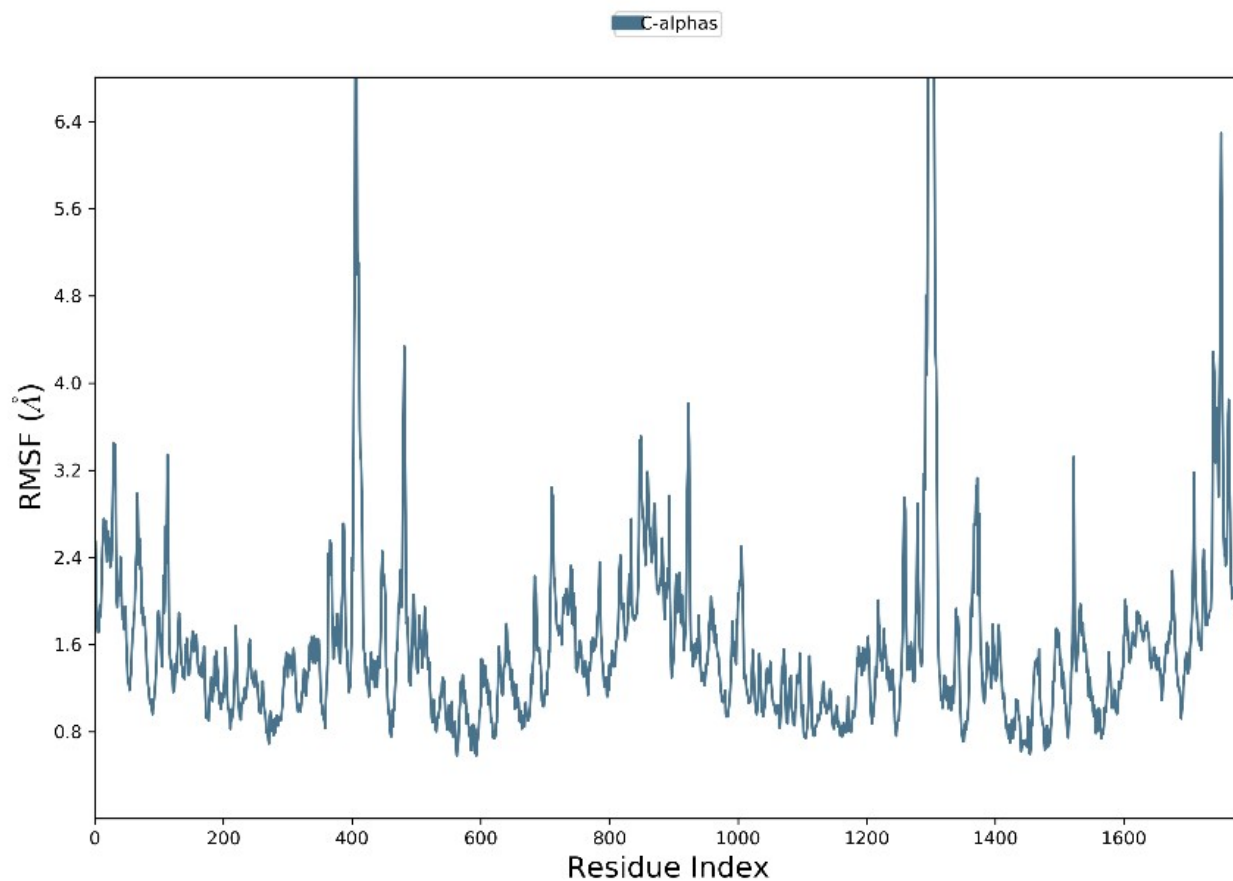

**Figure S11.** The RMSF (Å) values of 3TOP enzyme

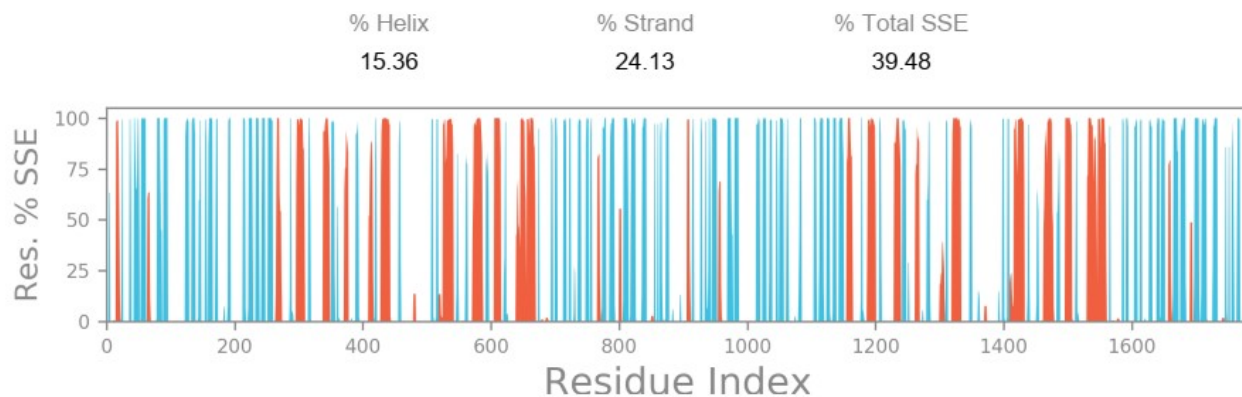

**Figure S12.** The secondary structure of 3TOP

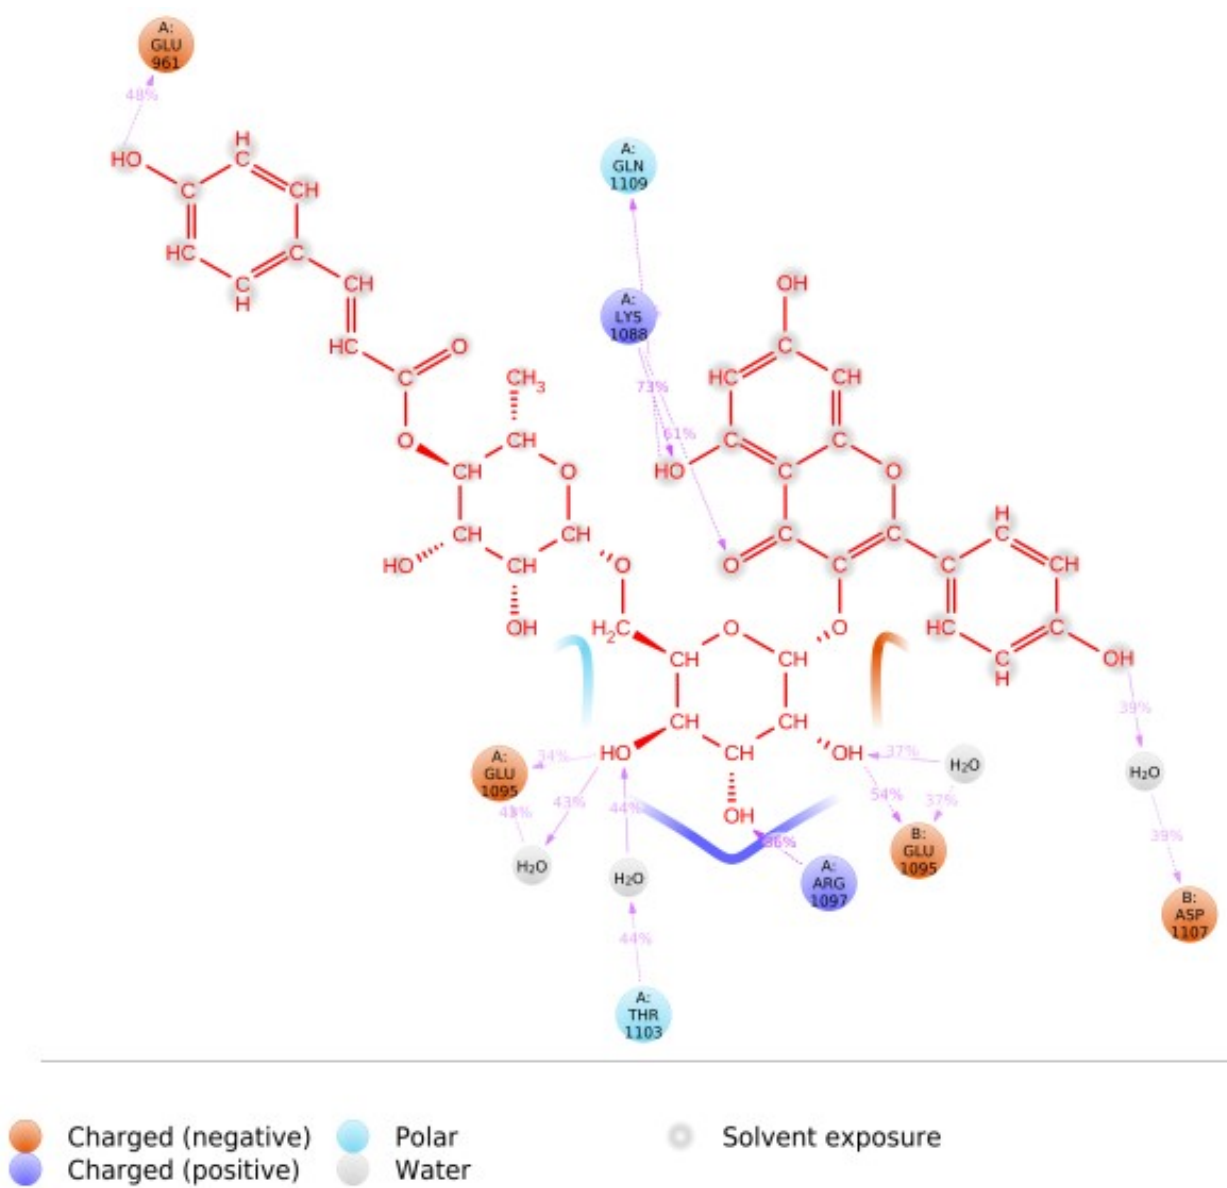

**Figure S13.** The contacts between pose 472 and 3TOP.

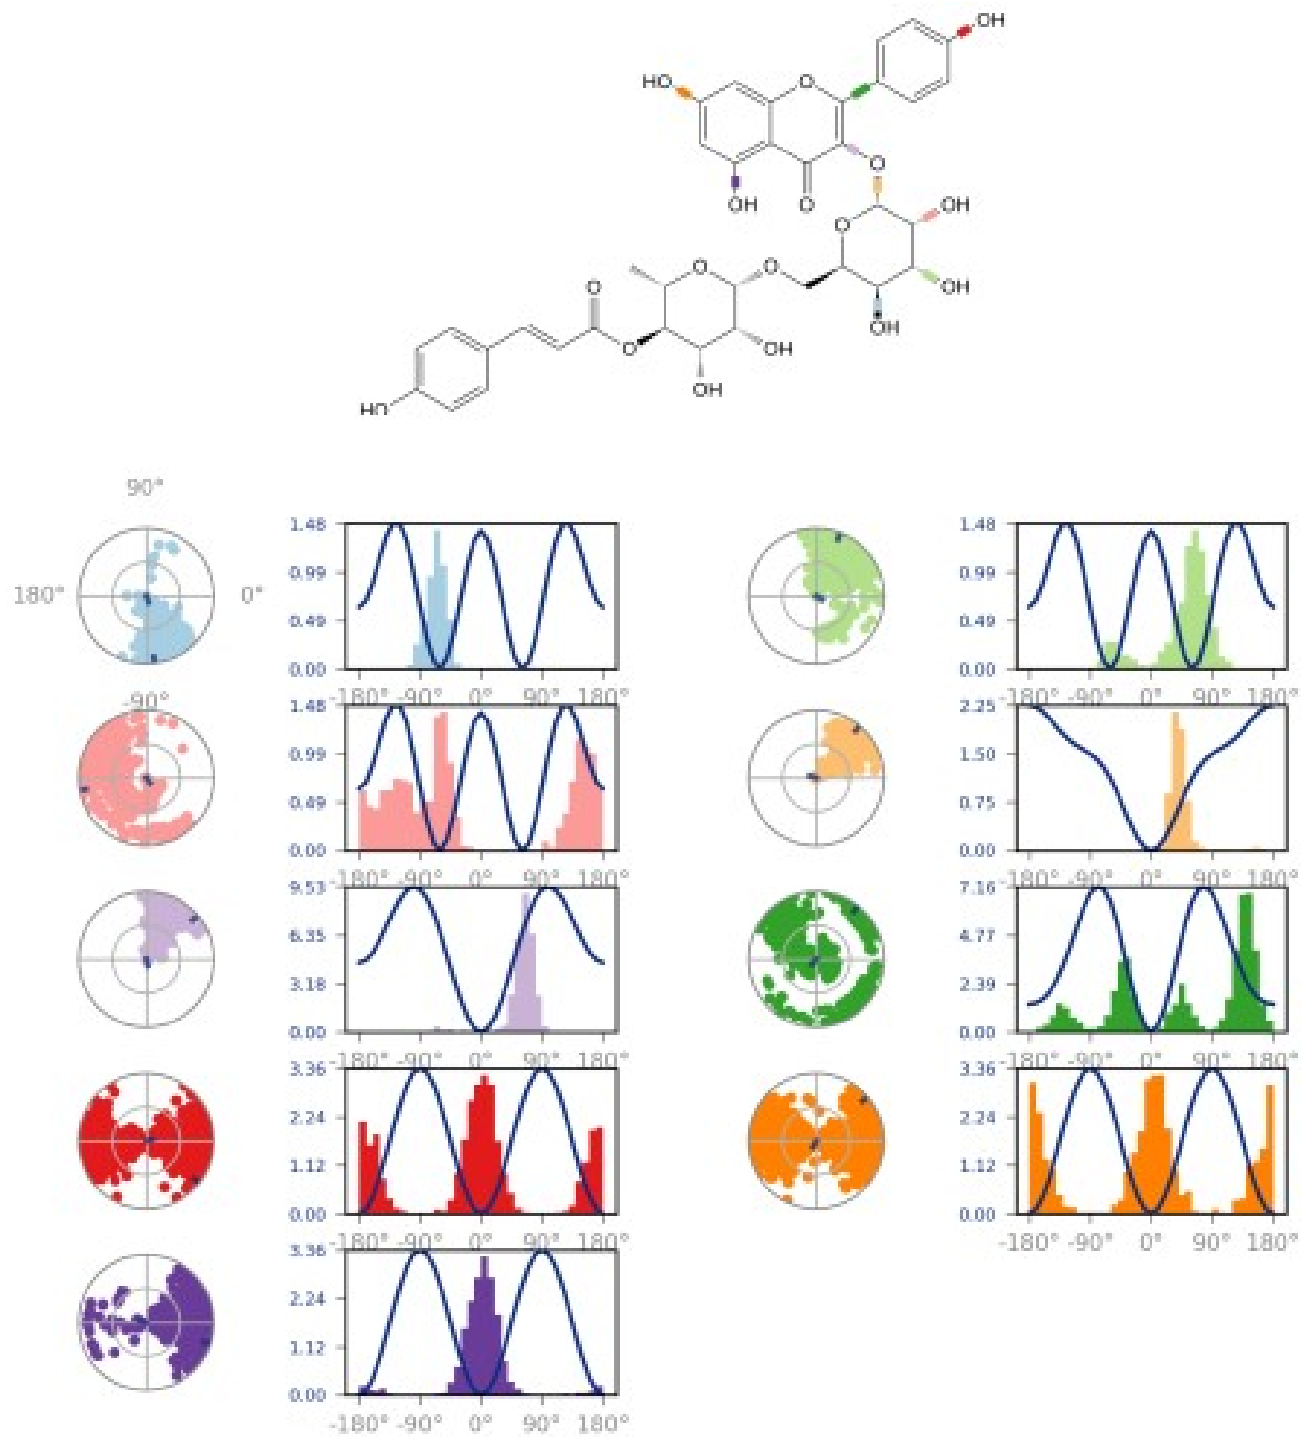

**Figure S14.** The torsion profile of pose 472.

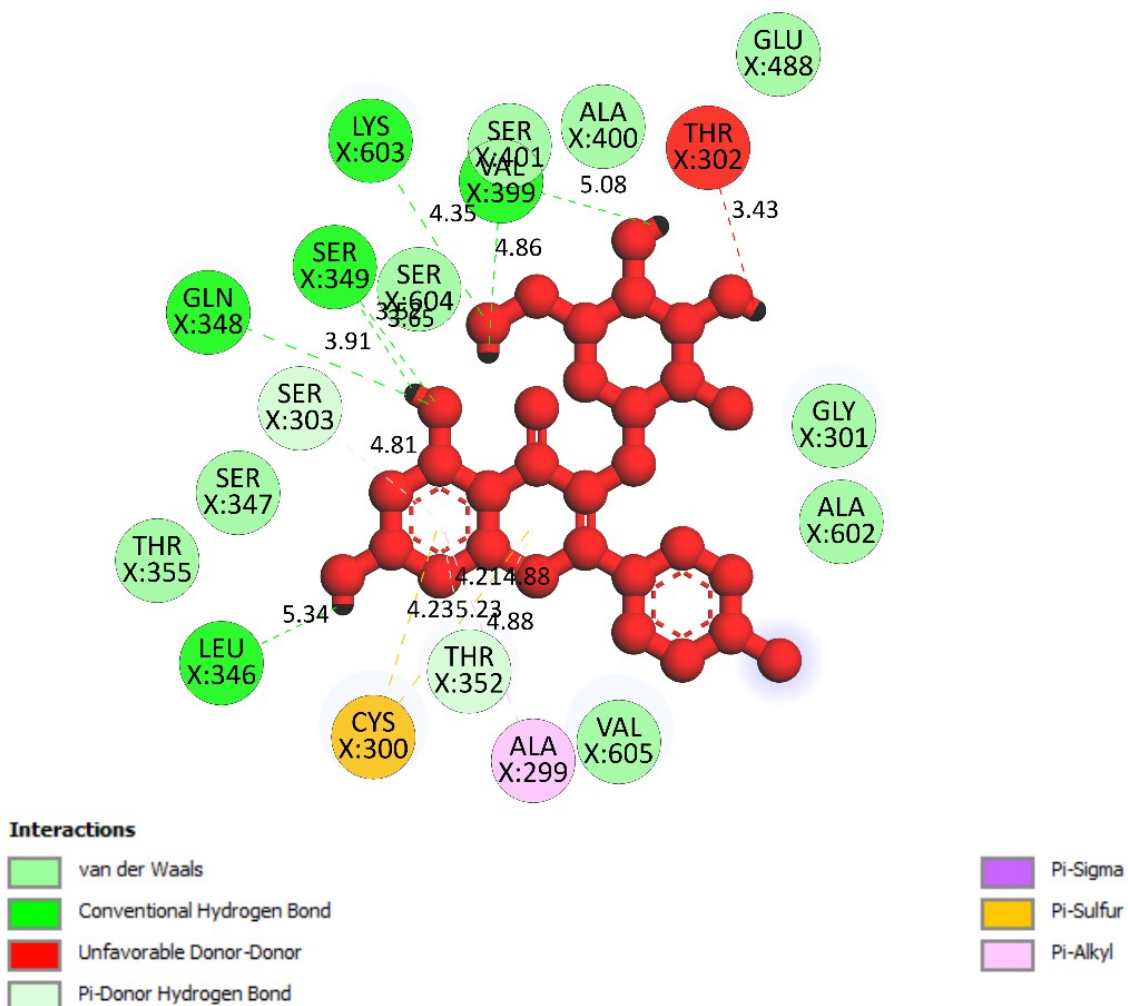

**Figure S15.** One 2D diagram showed the interactions between pose 305 and 2VF5

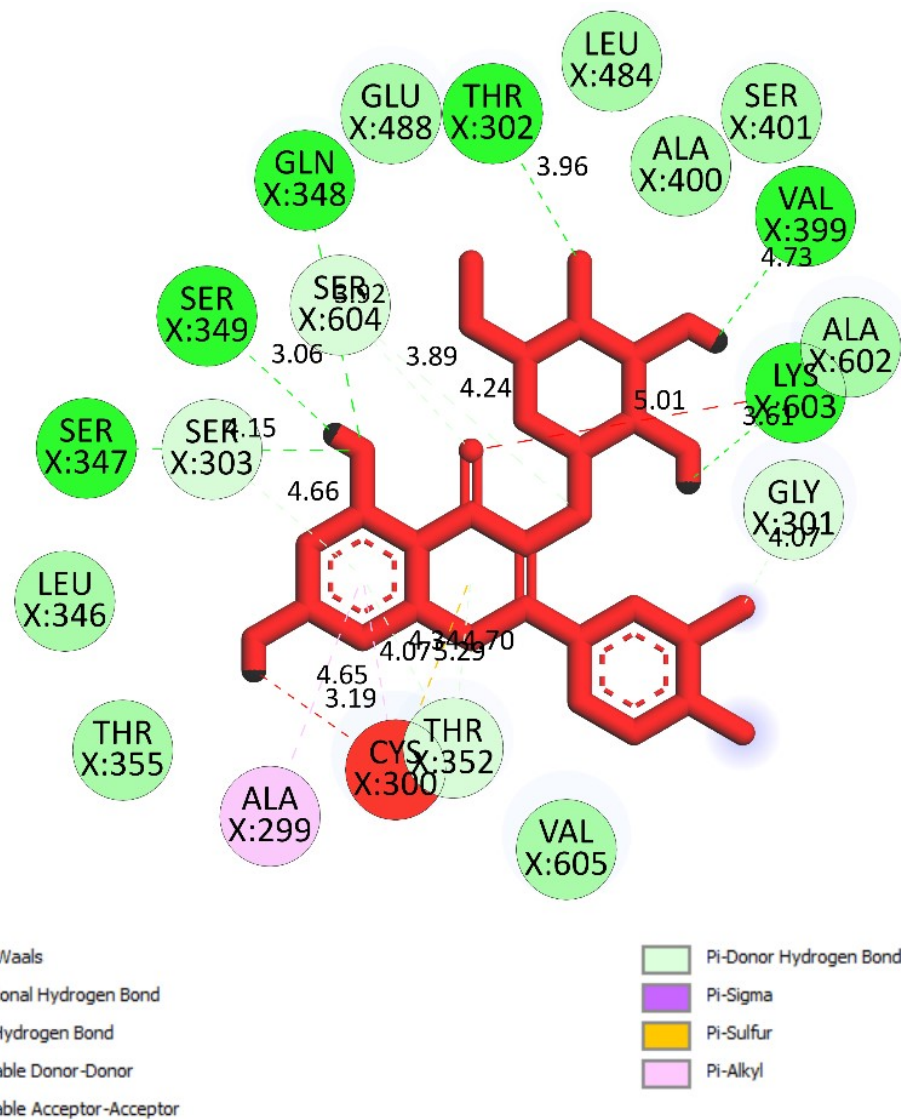

**Figure S16.** One 2D diagram showed the interactions between pose 387 and 2VF5



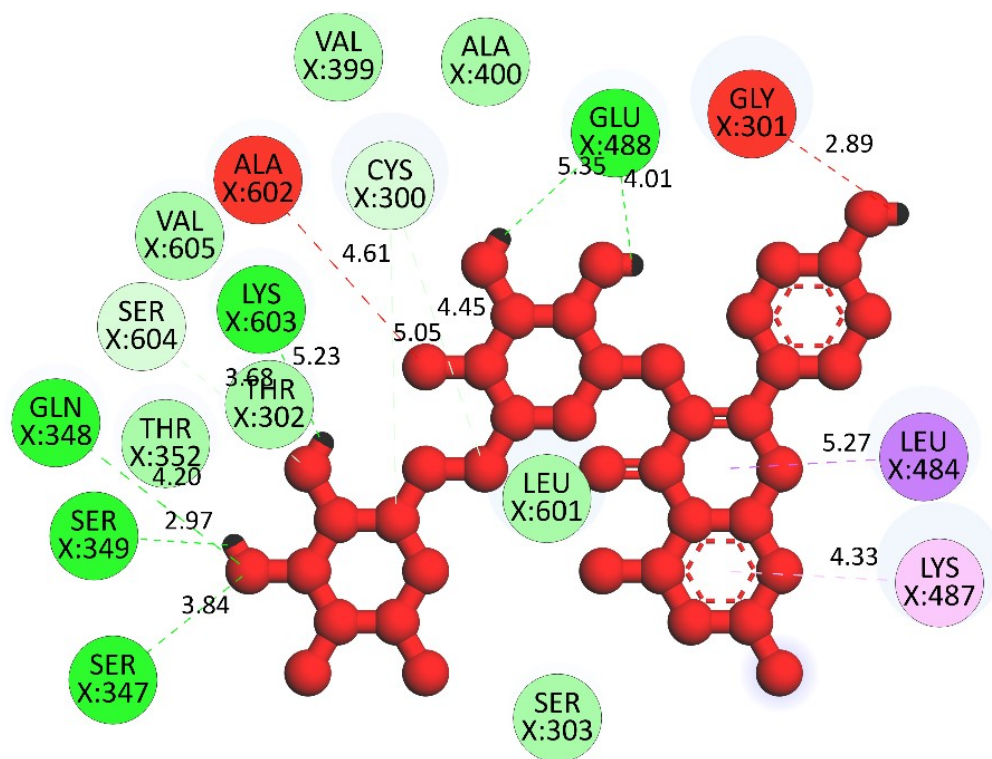

**Figure S17.** One 2D diagram showed the interactions between pose 136 (compound 4) and 2VF5

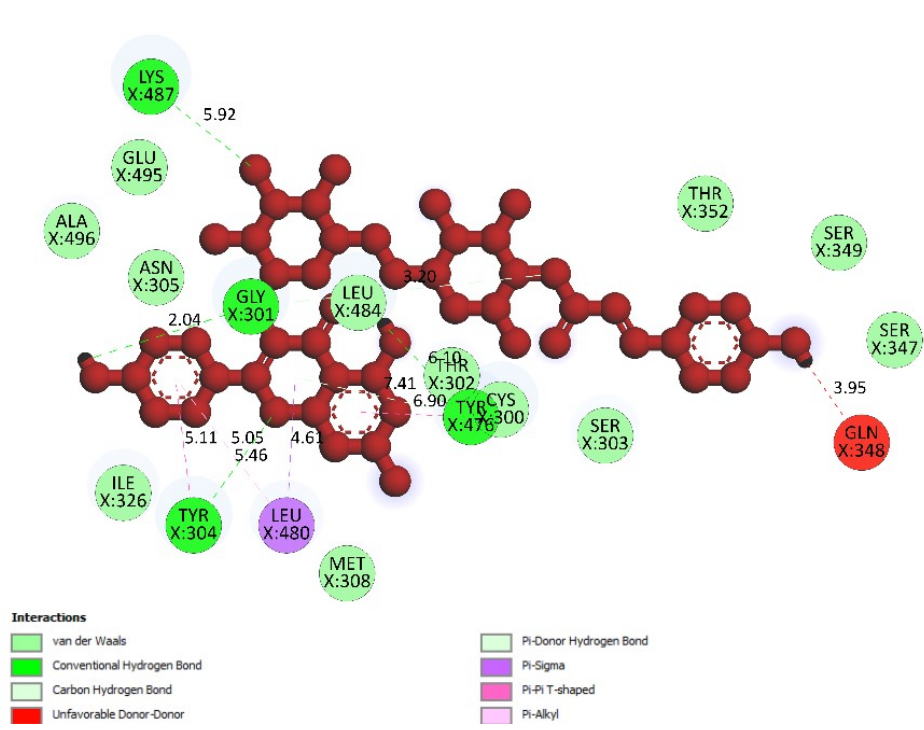

**Figure S18.** One 2D diagram showed the interactions between pose 43 (compound 1) and 2VF5

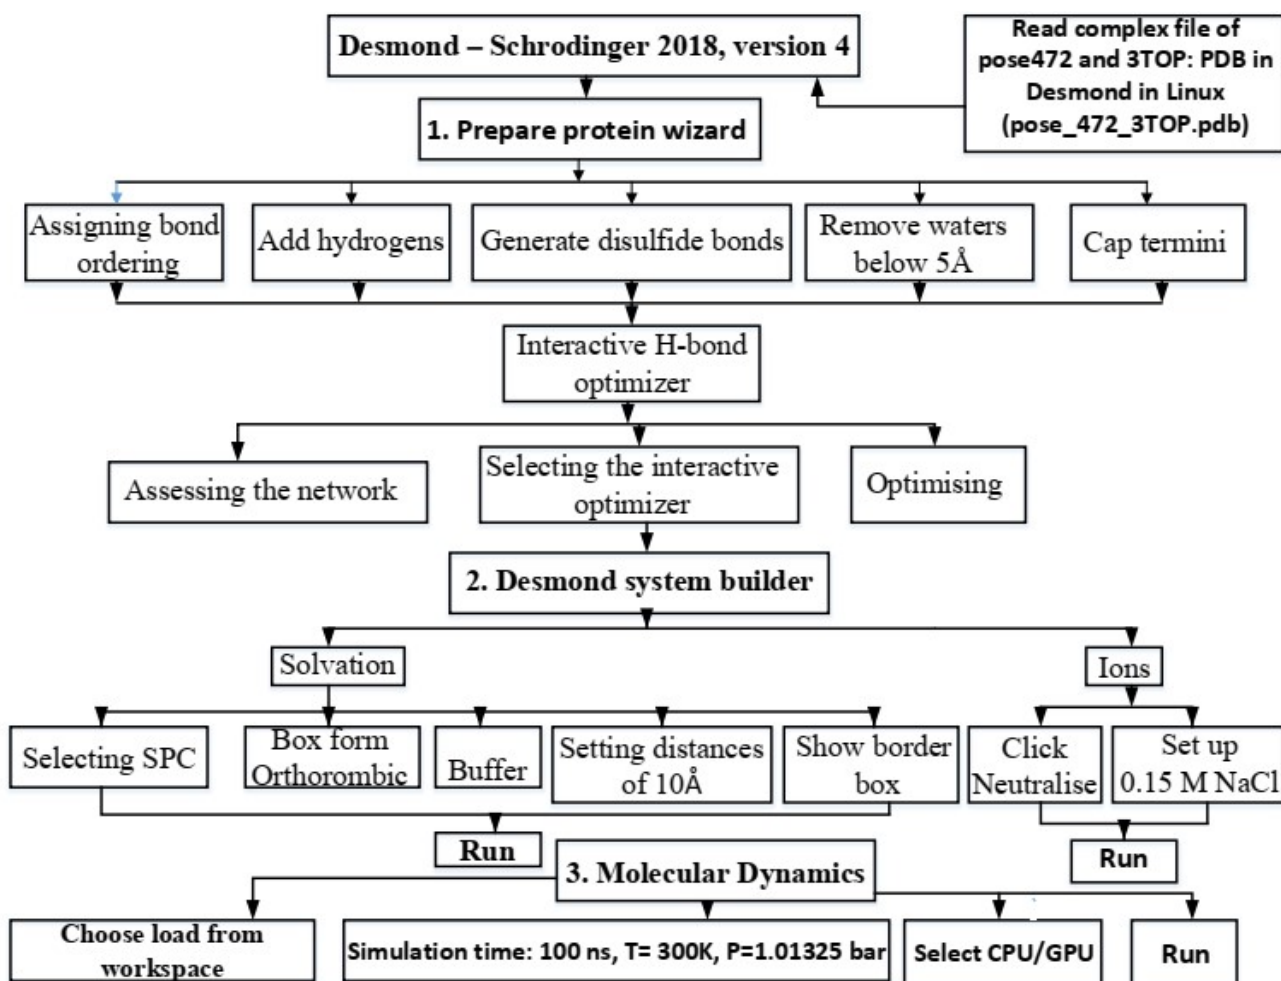

**Scheme S1.** Procedure molecular dynamic of the best docking pose 472 and 3TOP enzyme: PDB.
